# Supplementary material for: Potentially Toxic Elements (PTEs) Composition and Human Health Risk Assessment of PM10 on the Roadways of Industrial Complexes in South Korea
Source: MDPI journal article supplement (doi:10.3390/atmos12101307), 2021-10-07
Supplement: s1 [file s1]

## Supplementary Materials

**Table S1.** Average mass of PM10 per 1 m<sup>2</sup> and relative concentration of PM10 fraction in all RDS.

|                    | Amount of PM10<br>in RDS per 1m <sup>2</sup> | Relative % of<br>PM10 for Total<br>RDS |
|--------------------|----------------------------------------------|----------------------------------------|
| Unit               | g/m <sup>2</sup>                             | %                                      |
| Min.               | 0.16                                         | 0.02                                   |
| Max.               | 40.72                                        | 5.02                                   |
| Average            | 8.56                                         | 1.18                                   |
| Standard deviation | 7.72                                         | 0.83                                   |

**Table S2.** The results of the same analytical procedure using two types of certified reference materials, MESS-4 and PACS-3 (National Research Council, Ottawa, ON, Canada)

| Elements | Unit | Average Value<br>MESS 3 (n = 6) | S.D.  | Recovery<br>(%) | Average Value<br>PACS 2 (n = 6) | S.D.  | Recovery<br>(%) |
|----------|------|---------------------------------|-------|-----------------|---------------------------------|-------|-----------------|
| 24 Mg    | %    | 1.79                            | 0.13  | 111.86          | 1.48                            | 0.10  | 100.71          |
| 27 Al    | %    | 8.77                            | 0.51  | 102.12          | 6.71                            | 0.42  | 101.31          |
| 47 Ti    | %    | 0.43                            | 0.01  | 97.23           | 0.44                            | 0.01  | 99.27           |
| 57 Fe    | %    | 4.34                            | 0.18  | 100.10          | 4.31                            | 0.29  | 105.26          |
| 31 P     | %    | 0.12                            | 0.00  | 100.97          | 0.10                            | 0.00  | 101.76          |
|          |      |                                 |       |                 |                                 |       |                 |
| 7 Li     | ug/g | 67.87                           | 2.60  | 92.21           | 30.20                           | 1.34  | 93.79           |
| 9 Be     | ug/g | 2.44                            | 0.10  | 106.13          | 1.11                            | 0.05  | 111.26          |
| 55 Mn    | ug/g | 327.93                          | 16.10 | 101.21          | 447.91                          | 28.70 | 101.80          |
| 51 V     | ug/g | 241.46                          | 3.72  | 99.37           | 135.64                          | 1.88  | 101.99          |
| 52 Cr    | ug/g | 104.87                          | 2.13  | 99.87           | 93.50                           | 2.78  | 103.09          |
| 55 Mn    | ug/g | 322.95                          | 4.98  | 99.68           | 441.06                          | 3.17  | 100.24          |
| 59 Co    | ug/g | 13.83                           | 0.31  | 96.06           | 11.72                           | 0.09  | 101.90          |
| 60 Ni    | ug/g | 46.09                           | 1.38  | 98.27           | 41.02                           | 2.01  | 103.84          |
| 65 Cu    | ug/g | 35.47                           | 3.79  | 104.64          | 304.18                          | 6.65  | 98.12           |
| 66 Zn    | ug/g | 156.05                          | 1.67  | 98.14           | 375.98                          | 9.59  | 103.29          |
| 75 As    | ug/g | 21.42                           | 0.39  | 101.04          | 28.53                           | 0.99  | 108.91          |
| 107 Ag   | ug/g | 0.36                            | 0.01  | 200.74          | 1.15                            | 0.03  | 94.64           |
| 111 Cd   | ug/g | 0.37                            | 0.01  | 152.39          | 2.29                            | 0.06  | 108.31          |
| 114 Cd   | ug/g | 0.28                            | 0.01  | 116.56          | 2.66                            | 0.06  | 126.29          |
| 118 Sn   | ug/g | 2.11                            | 0.11  | 84.35           | 19.16                           | 0.64  | 96.74           |
| 121 Sb   | ug/g | 1.11                            | 0.03  | 108.87          | 11.76                           | 0.51  | 104.05          |
| 208 Pb   | ug/g | 22.10                           | 0.46  | 104.26          | 180.80                          | 15.90 | 98.80           |
| Min      |      |                                 |       | 92.208805       | Min                             |       |                 |
| Max      |      |                                 |       | 116.56217       | Max                             |       |                 |

**Table S3.** Specific chemical parameters used in the health risk assessment.

| Factor              |                       | Value                                                                                   |
|---------------------|-----------------------|-----------------------------------------------------------------------------------------|
| IngR                | mg/day                | 50                                                                                      |
| InhR                | m <sup>3</sup> /day   | 20                                                                                      |
| ABS, DAFabsorption  | (Unitless)            | 10 <sup>-3</sup> ( 1, As-0.03, Cd-10 <sup>-3</sup> )                                    |
| EF                  | days/365days          | 240                                                                                     |
| ED                  | years                 | 70                                                                                      |
| CF                  | Kg/mg                 | 10 <sup>-6</sup>                                                                        |
| BW -EPA             | kg                    | 70                                                                                      |
| PEF                 | m <sup>3</sup> /kg    | 1.36 * 10 <sup>9</sup> Joes and Sr 2019,<br>1.316 * 10 <sup>9</sup> Adamiec and Jr 2019 |
| SA                  | cm <sup>2</sup>       | 5700                                                                                    |
| SL(AF,SAF)adherence | mg/cm <sup>2</sup> *h | 0.2                                                                                     |
| RfD                 | mg/kg-day             | Chemical specific Value                                                                 |

**Table S4.** Coefficients of Kendall's tau<sub>b</sub> correlation analysis among the I<sub>geo</sub> of metals in PM10 of RDS.

|    | Mg    | Al    | Ti    | Fe    | P     | Li    | Be    | V     | Cr    | Mn    | Co    | Ni    | Cu    | Zn    | As    | Ag    | Cd    | Sn    | Sb    | Pb    | Hg    |
|----|-------|-------|-------|-------|-------|-------|-------|-------|-------|-------|-------|-------|-------|-------|-------|-------|-------|-------|-------|-------|-------|
| Mg | 1.000 | -.151 | -.076 | .356  | -.060 | -.059 | -.209 | .426  | .356  | .427  | -.029 | .216  | -.218 | .004  | -.138 | -.119 | -.069 | -.136 | -.169 | -.185 | -.151 |
| Al |       | 1.000 | .423  | -.439 | -.071 | .434  | .474  | -.234 | -.409 | -.418 | -.114 | -.362 | -.162 | -.334 | -.120 | -.225 | -.272 | -.099 | -.099 | -.135 | -.357 |
| Ti |       |       | 1.000 | -.114 | .141  | .291  | .389  | -.270 | -.085 | -.226 | .050  | -.083 | -.095 | -.103 | -.224 | -.244 | -.232 | .047  | -.089 | -.025 | -.378 |
| Fe |       |       |       | 1.000 | .049  | -.334 | -.320 | .332  | .643  | .599  | .262  | .588  | .048  | .373  | -.020 | .089  | .149  | .125  | -.013 | .070  | .208  |
| P  |       |       |       |       | 1.000 | .077  | .044  | -.174 | .152  | -.171 | .143  | .086  | .243  | .031  | .088  | .128  | .118  | .275  | .210  | .291  | .018  |
| Li |       |       |       |       |       | 1.000 | .363  | -.267 | -.297 | -.327 | -.148 | -.349 | -.233 | -.418 | -.186 | -.284 | -.348 | -.181 | -.145 | -.232 | -.369 |
| Be |       |       |       |       |       |       | 1.000 | -.311 | -.352 | -.412 | -.045 | -.305 | -.156 | -.318 | -.101 | -.274 | -.333 | -.081 | -.068 | -.092 | -.327 |
| V  |       |       |       |       |       |       |       | 1.000 | .330  | .441  | .153  | .328  | .038  | .205  | .217  | .231  | .259  | .052  | .073  | .086  | .313  |
| Cr |       |       |       |       |       |       |       |       | 1.000 | .510  | .287  | .615  | .110  | .349  | .040  | .208  | .269  | .215  | .087  | .174  | .265  |
| Mn |       |       |       |       |       |       |       |       |       | 1.000 | .121  | .401  | -.122 | .275  | -.068 | .041  | .097  | -.075 | -.149 | -.098 | .162  |
| Co |       |       |       |       |       |       |       |       |       |       | 1.000 | .440  | .311  | .312  | .268  | .319  | .319  | .446  | .351  | .433  | .302  |
| Ni |       |       |       |       |       |       |       |       |       |       |       | 1.000 | .222  | .435  | .117  | .266  | .301  | .308  | .169  | .259  | .304  |
| Cu |       |       |       |       |       |       |       |       |       |       |       |       | 1.000 | .433  | .487  | .641  | .605  | .644  | .636  | .664  | .494  |
| Zn |       |       |       |       |       |       |       |       |       |       |       |       |       | 1.000 | .230  | .430  | .487  | .412  | .289  | .396  | .392  |
| As |       |       |       |       |       |       |       |       |       |       |       |       |       |       | 1.000 | .608  | .554  | .395  | .544  | .525  | .569  |
| Ag |       |       |       |       |       |       |       |       |       |       |       |       |       |       |       | 1.000 | .773  | .523  | .606  | .641  | .665  |
| Cd |       |       |       |       |       |       |       |       |       |       |       |       |       |       |       |       | 1.000 | .532  | .572  | .659  | .673  |
| Sn |       |       |       |       |       |       |       |       |       |       |       |       |       |       |       |       |       | 1.000 | .673  | .725  | .432  |
| Sb |       |       |       |       |       |       |       |       |       |       |       |       |       |       |       |       |       |       | 1.000 | .724  | .540  |
| Pb |       |       |       |       |       |       |       |       |       |       |       |       |       |       |       |       |       |       |       | 1.000 | .494  |
| Hg |       |       |       |       |       |       |       |       |       |       |       |       |       |       |       |       |       |       |       |       | 1.000 |

 : positive correlation with  $p < 0.01$ ; 
  : negative correlation with  $p < 0.01$ ; 
  : correlation with  $p < 0.05$

**Table S5.** Rotated component matrix extracted by principle component analysis (PCA) with Varimax rotation with Kaiser Normalization for heavy metals related to anthropogenic activities in PM10 of RDS.

|               | Component   |             |
|---------------|-------------|-------------|
|               | 1           | 2           |
| Mg            | -.267       | <b>.852</b> |
| Fe            | -.012       | <b>.972</b> |
| V             | .497        | <b>.767</b> |
| Cr            | .077        | <b>.922</b> |
| Mn            | -.100       | <b>.921</b> |
| Ni            | .369        | <b>.794</b> |
| Cu            | <b>.983</b> | -.089       |
| Zn            | <b>.881</b> | .261        |
| As            | <b>.950</b> | -.105       |
| Ag            | <b>.985</b> | .036        |
| Cd            | <b>.982</b> | .124        |
| Sn            | <b>.877</b> | .100        |
| Sb            | <b>.974</b> | -.037       |
| Pb            | <b>.963</b> | -.020       |
| Hg            | <b>.911</b> | .317        |
| PLI           | <b>.974</b> | .005        |
| % of Variance | 60.357      | 28.869      |
| Cumulative %  | 60.357      | 89.225      |

**Table S6.** Coefficients of Kendall's tau\_b correlation analysis among the  $I_{geo}$  of metals in PM10 of RDS.

|       | PLI   | Zn/Cu        | Cu/Sb        |
|-------|-------|--------------|--------------|
| PLI   | 1.000 | <b>-.243</b> | <b>-.158</b> |
| Zn/Cu |       | 1.000        | .102         |
| Cu/Sb |       |              | 1.000        |

 :  $p < 0.05$

**Table S7.** Pearson's correlation analysis among the  $I_{geo}$  of metals in PM10 of RDS.

|                     | AsCR <sub>ing</sub> | CdCR <sub>ing</sub> | NiCR <sub>ing</sub> | PbCR <sub>ing</sub> | HI   | Traffic volume |
|---------------------|---------------------|---------------------|---------------------|---------------------|------|----------------|
| AsCR <sub>ing</sub> | 1                   | .711                | -.156               | .114                | .450 | .019           |
| CdCR <sub>ing</sub> |                     | 1                   | .548                | .238                | .496 | .072           |
| NiCR <sub>ing</sub> |                     |                     | 1                   | .125                | .115 | -.080          |
| PbCR <sub>ing</sub> |                     |                     |                     | 1                   | .936 | .929           |
| HI                  |                     |                     |                     |                     | 1    | .828           |
| Traffic volume      |                     |                     |                     |                     |      | 1              |

■ :  $p < 0.05$

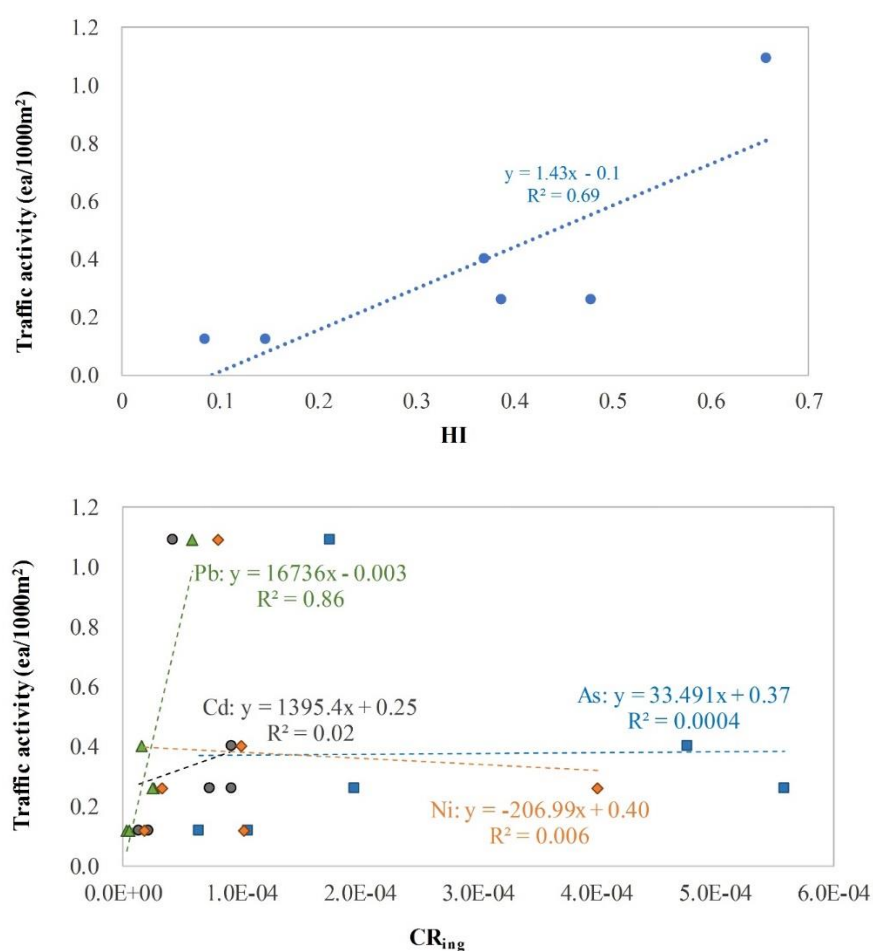

**Figure S1.** Correlation between health risk of PM10 and traffic activity (traffic volume)
